# Supplementary material for: Systematic review of clinical practice guidelines recommendations about primary cardiovascular disease prevention for older adults
Source: PubMed Central journal article supplement (PMC4546022; doi:10.1186/s12875-015-0310-1), 2015-08-20
Supplement: 12875_2015_310_MOESM1_ESM.pdf [file 12875_2015_310_MOESM1_ESM.pdf]

**Appendix A. Overview CPG recommendations older people (n=47), organised by medical condition then by year of publication (reverse chronological)**

| <b>Medical Condition</b> | <b>Organisation / Guideline Developer</b>                                     | <b>Year of publication/ update</b> | <b>Country/region</b> | <b>Main risk model used</b>                   |
|--------------------------|-------------------------------------------------------------------------------|------------------------------------|-----------------------|-----------------------------------------------|
| CVD                      | British Joint Societies [1]                                                   | 2005                               | UK                    | Joint British Societies Risk Prediction Chart |
| CVD                      | World Health Organization [2]                                                 | 2007                               | International         | Various risk models mentioned                 |
| CVD                      | Scottish Intercollegiate Guidelines Network [3]                               | 2007                               | Scotland              | ASSIGN                                        |
| CVD                      | European Society of Cardiology [4]                                            | 2007                               | Europe                | SCORE                                         |
| CVD                      | British Columbia Medical Association/Ministry of Health [5]                   | 2008                               | Canada                | UKPDS and Framingham                          |
| CVD                      | The Endocrine Society [6]                                                     | 2008                               | International         | Framingham, PROCAM, SCORE                     |
| CVD                      | National Institute for Health and Clinical Excellence [7]                     | 2008                               | UK                    | Various risk models mentioned                 |
| CVD                      | Ministry of Health, Malaysia [8]                                              | 2008                               | Malaysia              | Various risk models mentioned                 |
| CVD                      | US Preventive Services Task Force [9]                                         | 2009                               | US                    | Framingham                                    |
| CVD                      | National Academy of Clinical Biochemistry [10]                                | 2009                               | US                    | Framingham                                    |
| CVD                      | Toward Optimized Practice Program, Alberta [11]                               | 2009                               | Canada                | Framingham                                    |
| CVD                      | Second Indo-US Health Summit Expert Panel [12]                                | 2009                               | US/India              | Various risk models mentioned                 |
| CVD                      | American College of Cardiology Foundation and American Heart Association [13] | 2010                               | US                    | Various risk models mentioned                 |
| CVD                      | American College of Preventive Medicine [14]                                  | 2011                               | US                    | Framingham                                    |
| CVD                      | Ministry of Health Clinical Practice Guidelines Workgroup [15]                | 2011                               | Singapore             | Framingham adapted to Singapore population    |
| CVD                      | American Heart Association [16]                                               | 2011                               | US                    | Framingham or Reynolds Risk Score             |
| CVD                      | European Society of Cardiology [17]                                           | 2012                               | Europe                | Framingham or Score                           |
| CVD                      | National Vascular Disease Prevention Alliance, Australia [18]                 | 2012                               | Australia             | Framingham                                    |
| CVD                      | National Screening Committee [19]                                             | 2012                               | UK                    | Various risk models mentioned                 |
| CVD                      | New Zealand Guidelines Group [20]                                             | 2012                               | New Zealand           | New Zealand CVD Risk Charts                   |
| CVD                      | Map of Medicine - NHS choices [21]                                            | 2013                               | UK                    | Various risk models mentioned                 |
| CVD                      | Cardiovascular Disease Risk Assessment Steering Committee [22]                | 2013                               | New Zealand           | New Zealand CVD Risk Charts                   |
| CVD                      | American College of Cardiology/American Heart                                 | 2013                               | US                    | New Pooled Cohort ASCVD Risk Equations        |

|              |                                                                                           |            |               |                                              |  |
|--------------|-------------------------------------------------------------------------------------------|------------|---------------|----------------------------------------------|--|
|              | Association [23]                                                                          |            |               |                                              |  |
| Dyslipidemia | United States Department of Veterans Affairs / Department of Defense [24]                 | 2006       | US            | Framingham                                   |  |
| Dyslipidemia | US Preventive Services Task Force [25]                                                    | 2008       | US            | Various risk models mentioned                |  |
| Dyslipidemia | Caribbean Cardiac Society [26]                                                            | 2008       | Caribbean     | Risk model not specified                     |  |
| Dyslipidemia | University of Michigan Health System [27]                                                 | 2009       | US            | Framingham                                   |  |
| Dyslipidemia | Ontario Association of Medical Laboratories [28]                                          | 2010       | Canada        | Framingham                                   |  |
| Dyslipidemia | European Society of Cardiology & European Artherosclerosis Society [29]                   | 2011       | Europe        | SCORE (but other risk models mentioned)      |  |
| Dyslipidemia | Institute for Clinical Systems Improvement [30]                                           | 2011       | US            | Framingham                                   |  |
| Dyslipidemia | Ministry of Health, Malaysia [31]                                                         | 2011       | Malaysia      | Framingham (but other risk models mentioned) |  |
| Dyslipidemia | Canadian Cardiovascular Society [32]                                                      | 2013       | Canada        | Framingham                                   |  |
| Dyslipidemia | American Association of Clinical Endocrinologists [33]                                    | 2012       | US            | Framingham or Reynolds Risk Score            |  |
| Dyslipidemia | South African Heart Association/Lipid and Atherosclerosis Society of Southern Africa [34] | 2012       | South Africa  | Framingham                                   |  |
| Dyslipidemia | American College of Cardiology/American Heart Association [35]                            | 2013       | US            | New Pooled Cohort ASCVD Risk Equations       |  |
| Dyslipidemia | Michigan Quality Improvement Consortium [36]                                              | 2013       | US            | Framingham                                   |  |
| Hypertension | Heart and Stroke Foundation of Ontario, Registered Nurses' Association of Ontario [37]    | 2005/2009* | Canada        | Various risk models mentioned                |  |
| Hypertension | United States Department of Veterans Affairs / Department of Defense [38]                 | 2004       | US            | Risk model not specified                     |  |
| Hypertension | National Heart, Lung, and Blood Institute [39]                                            | 2004       | US            | Framingham                                   |  |
| Hypertension | European Society of Cardiology & European Society of Hypertension [40]                    | 2007       | Europe        | Heart-Score based on SCORE                   |  |
| Hypertension | US Preventive Services Task Force [41]                                                    | 2007       | US            | Risk model not specified                     |  |
| Hypertension | Latin American Expert Group [42]                                                          | 2009       | Latin America | Own risk charts                              |  |
| Hypertension | National Heart Foundation of Australia [43]                                               | 2010       | Australia     | Australian Risk Charts                       |  |
| Hypertension | National Institute for Health and Clinical Excellence [44]                                | 2011       | UK            | Various risk models mentioned                |  |
| Hypertension | South African Hypertension Society [45]                                                   | 2011       | South Africa  | Risk chart based on ESH/ESC guidelines       |  |
| Hypertension | Institute for Clinical Systems Improvement [46]                                           | 2012       | US            | Framingham                                   |  |
| Hypertension | Canadian Hypertension Education Program [47]                                              | 2013       | Canada        | Risk model not specified                     |  |

CVD = cardiovascular disease, \* 2009 is update of 2005

## REFERENCES

1. British Cardiac Society, British Hypertension Society, Diabetes UK, HEART UK, Primary Care Cardiovascular Society, The Stroke Association. JBS 2: Joint British Societies' guidelines on prevention of cardiovascular disease in clinical practice. *Heart*. 2005;91:v1-v52.
2. WHO. Prevention of Cardiovascular Disease: Guidelines for assessment and management of cardiovascular risk. WHO, Geneva. 2007.
3. Scottish Intercollegiate Guidelines Network. Risk estimation and the prevention of cardiovascular disease: A national clinical guideline. NHS, Edinburgh. 2007.
4. Collins P, Rosano G, Casey C, Daly C, Gambacciani M, Hadji P, Kaaja R, Mikkola T, Palacios S, Preston R, Simon T, Stevenson J, Stramba-Badiale M. Management of cardiovascular risk in the peri-menopausal woman: a consensus statement of European cardiologists and gynaecologists. *Eur Heart J*. 2007;28:2028-40.
5. Guidelines and Protocols Advisory Committee. Cardiovascular Disease - Primary Prevention. British Columbia Medical Association, British Columbia Ministry of Health Service, British Columbia. 2008.
6. Rosenzweig JL, Ferrannini E, Grundy SM, Haffner SM, Heine RJ, Horton ES, Kawamori R. Primary prevention of cardiovascular disease and type 2 diabetes in patients at metabolic risk: an Endocrine Society clinical practice guideline. *J Clin Endocrinol Metab*. 2008;93:3671-89.
7. National Institute for Health and Clinical Excellence. NICE Clinical Guideline 67: Lipid modification - Cardiovascular risk assessment and the modification of blood lipids for the primary and secondary prevention of cardiovascular disease. National Institute for Health and Clinical Excellence, London. 2010.
8. Ministry of Health Malaysia, Academy of Medicine Malaysia, National Heart Association of Malaysia. Prevention of Cardiovascular Disease in Women (1st edition). Ministry of Health, Putrajaya. 2008.
9. U.S. Preventive Services Task Force. Aspirin for the prevention of cardiovascular disease: U.S. Preventive Services Task Force Recommendation Statement. *Ann Intern Med*. 2009;150:396-404.
10. Myers, GL (ed), National Academy of Clinical Biochemistry. Laboratory Medicine Practice Guidelines - Emerging Biomarkers for Primary Prevention of Cardiovascular Disease and Stroke. American Association for Clinical Chemistry; Washington, DC. 2009.
11. Towards Optimized Practice Program. Guideline for Management of Modifiable Risk Factors in Adults at High Risk for Cardiovascular Events. Towards Optimized Practice Program, Edmonton. 2009.
12. Second Indo-US Health Summit Expert Panel. Recommendations of the second Indo-U.S. health summit on prevention and control of cardiovascular disease among Asian Indians. *Indian Heart Journal*. 2009;61:265-74.
13. Greenland P, Alpert JS, Beller GA, Benjamin EJ, Budoff MJ, Fayad ZA, Foster E, Hlatky MA, Hodgson JM, Kushner FG, Lauer MS, Shaw LJ, Smith SC, Taylor AJ, Weintraub WS, Wenger NK. 2010 ACCF/AHA guideline for assessment of cardiovascular risk in asymptomatic adults. A report of the American College of Cardiology Foundation/American Heart Association Task Force on Practice Guidelines. *Journal of the American College of Cardiology*. 2010;56(25):e50
14. Lim LS, Haq N, Mahmood S, Hoeksema L, ACPM Prevention Practice Committee. Atherosclerotic Cardiovascular Disease Screening in Adults American College of Preventive Medicine Position Statement on Preventive Practice. *Am J Prev Med*. 2011;40(3):380

15. Goh LG, Chua T, Kang V, Kwong KH, Lim WY, Low LP, Pereira J, Venketasubramanian N, Sethi SK, Sum CF, Tan CL, Tan HK, Tan SM, Wong TK. Ministry of Health Clinical Practice Guidelines: screening of cardiovascular disease and risk factors. *Singapore Med J.* 2011;52:220-5.
16. Mosca L, Benjamin EJ, Berra K, Bezanson JL, Dolor RJ, Lloyd-Jones DM, Newby LK, Pina IL, Roger VL, Shaw LJ, Zhao D, Beckie TM, Bushnell C, D'Armiento J, Kris-Etherton PM, Fang J, Ganiats TG, Gomes AS, Gracia CR, Haan CK, Jackson EA, Judelson DR, Kelepouris E, Lavie CJ, Moore A, Nussmeier NA, Ofili E, Oparil S, Ouyang P, Pinn VW, Sherif K, Smith SC, Jr., Sopko G, Chandra-Strobos N, Urbina EM, Vaccarino V, Wenger NK. Effectiveness-based guidelines for the prevention of cardiovascular disease in women--2011 update: a guideline from the American Heart Association. *Circulation.* 2011;123:1243-62.
17. Perk J, De Backer G, Gohlke H, Graham I, Reiner Z, Verschuren M, Albus C, Benlian P, Boysen G, Cifkova R, Deaton C, Ebrahim S, Fisher M, Germano G, Hobbs R, Hoes A, Karadeniz S, Mezzani A, Prescott E, Ryden L, Scherer M, Syvanne M, Scholte op Reimer WJ, Vrints C, Wood D, Zamorano JL, Zannad F, European Association for Cardiovascular Prevention, Rehabilitation and Guidelines, ESC Committee for Practice Guidelines. European Guidelines on cardiovascular disease prevention in clinical practice (version 2012). The Fifth Joint Task Force of the European Society of Cardiology and Other Societies on Cardiovascular Disease Prevention in Clinical Practice. *Eur Heart J.* 2012;33:1635-701.
18. National Vascular Disease Prevention Alliance. Guidelines for the management of absolute cardiovascular disease risk. NVDPA, Australia. 2012.
19. National Screening Committee. The Handbook for Vascular Risk Assessment, Risk Reduction and Risk Management. University of Leicester, Leicester. 2012.
20. New Zealand Guideline Groups. New Zealand Primary Care Handbook 2012. 3rd edition. NZGG, Wellington. 2012.
21. Map of Medicine. Cardiovascular disease (CVD) risk assessment and primary prevention. NHS, London. 2013.
22. Cardiovascular Disease Risk Assessment Steering Group, New Zealand Guidelines Group. New Zealand Primary Care Handbook 2012 (updated 2013): Cardiovascular Disease Risk Assessment. New Zealand Guidelines Group, Wellington. 2013.
23. Goff DC, Lloyd-Jones DM, Bennett G, Coady S, D'Agostino RB, Gibbons R, Greenland P, Lackland DT, Levy D, O'Donnell CJ, Robinson J, Schwartz JS, Shero ST, Smith SC, Sorlie P, Stone NJ, Wilson PW. ACC/AHA Guideline on the Assessment of Cardiovascular Risk: A Report of the American College of Cardiology/American Heart Association Task Force on Practice Guidelines. *Circulation.* 2013.
24. VA/DoD, The Management of Dyslipidemia Working Group. VA/DoD Clinical Practice Guideline for the Management of Dyslipidemia. Department of Veterans Affairs; Washington, DC. 2006.
25. U.S. Preventive Services Task Force. Screening for lipid disorders in adults: U.S. Preventive Services Task Force recommendation statement. Agency for Healthcare Research and Quality; Rockville, MD. 2008.
26. Chung EE and Caribbean Cardiac Society. Best Practice Guidelines for Hypercholesterolemia. 2008.
27. University of Michigan Health System. Screening and Management of Lipids. University of Michigan. 2009.
28. Ontario Association of Medical Laboratories. Guideline for Lipid Testing in Adults (CLP017). Ontario Association of Medical Laboratories, North York. 2010.
29. The Task Force for the management of dyslipidaemias of the European Society of Cardiology (ESC) and the European Atherosclerosis Society (EAS). ESC/EAS Guidelines for the management of dyslipidaemias. *Eur Heart J.* 2011;32:1769-818.
30. Woolley T, Kopecky S, O'Connor P, Susan Hanson, Dupras D, Kofron P, Krueger K, Needham R, Johnson DJ, Mikel K. Bofenkamp, Groen S, Institute for Clinical Systems Improvement. Healthcare Guideline: Lipid Management in Adults. Institute for Clinical Systems Improvement, Bloomington. 2011.

31. Ministry of Health, National Heart Association of Malaysia, Academy of Medicine. 4th Edition of Clinical Practice Guidelines: Management of Dyslipidemia 2011. Ministry of Health, Putrajaya. 2011.
32. Anderson TJ, Gregoire J, Hegele RA, Couture P, Mancini GB, McPherson R, Francis GA, Poirier P, Lau DC, Grover S, Genest J, Jr., Carpentier AC, Dufour R, Gupta M, Ward R, Leiter LA, Lonn E, Ng DS, Pearson GJ, Yates GM, Stone JA, Ur E. 2012 update of the Canadian Cardiovascular Society guidelines for the diagnosis and treatment of dyslipidemia for the prevention of cardiovascular disease in the adult. *The Canadian Journal of Cardiology*. 2013;29:151-67.
33. Jellinger PS, Smith DA, Mehta AE, Ganda O, Handelsman Y, Rodbard HW, Shepherd MD, Seibel JA and AACE Taskforce for Management of Dyslipidemia and Prevention of Atherosclerosis. American Association of Clinical Endocrinologists' Guidelines for Management of Dyslipidemia and Prevention of Artherosclerosis. *Endocrine Practice*. 2012;18(Suppl 1)
34. Klug E. South African Dyslipidaemia Guideline Consensus Statement. *South African Medical Journal*. 2012;102:178-188.
35. Stone NJ, Robinson J, Lichtenstein AH, Barey Mertz CN, Blum CB, Eckel RH, Goldberg AC, Gordon D, Levy D, Lloyd-Jones DM, McBride P, Schwartz JS, Shero ST, Smith SC, Watson K, Wilson PW. ACC/AHA Guideline on the Treatment of Blood Cholesterol to Reduce Atherosclerotic Cardiovascular Risk in Adults: A Report of the American College of Cardiology/American Heart Association Task Force on Practice Guidelines. *Circulation*. 2013.
36. Michigan Quality Improvement Consortium. Screening and Management of Hypercholesterolemia. Michigan Quality Improvement Consortium, Southfield (MI). 2013.
37. Registered Nurses Association of Ontario. Nursing Management of Hypertension. 2005. Supplement: 2009. Heart and Stroke Foundation of Ontario, Ontario. 2005.
38. VA/DoD, Management of Hypertension in the Primary Care Setting Working Group. VA/DoD Clinical Practice Guideline for Diagnosis and Management of Hypertension in the Primary Care Setting. Department of Veterans Affairs; Washington, DC. 2004.
39. U.S. Department of Health and Human Services, National Institutes of Health, National Heart, Lung, and Blood Institute, National High Blood Pressure Education Program. The Seventh Report of the Joint National Committee on Prevention, Detection, Evaluation, and Treatment of High Blood Pressure. U.S. Department of Health and Human Services. 2004.
40. The Task Force for the Management of Arterial Hypertension of the European Society for Hypertension (ESH) and of the European Society of Cardiology (ESC). 2007 Guidelines for the management of arterial hypertension. *Eur Heart J*. 2007;28:1462-536.
41. U.S. Preventive Services Task Force. Screening for high blood pressure: U.S. Preventive Services Task Force reaffirmation recommendation statement. *Annals of Internal Medicine*. 2007;147:783-786.
42. Sanchez RA, Ayala M, Baglivo H, Velazquez C, Burlando G, Kohlmann O, Jimenez J, Jaramillo PL, Brandao A, Valdes G, Alcocer L, Bendersky M, Ramirez AJ, Zanchetti A, Latin American Expert Group. Latin American guidelines on hypertension. *Journal of Hypertension*. 2009;27:905-922.
43. National Heart Foundation of Australia. Guide to management of hypertension 2008. Updated December 2010. National Heart Foundation of Australia. 2010.
44. National Institute for Health and Clinical Excellence. NICE Clinical Guideline 127: Hypertension. Clinical management of primary hypertension in adults. National Institute for Health and Clinical Excellence, London. 2011.
45. Seedat YK and Rayner BL. South African Hypertension Guideline 2011. *South African Medical Journal*. 2012;102:60-88.

46. Luehr D, Woolley T, Burke R, Dohmen F, Hayes R, Johnson M, Kerandi H, Margolis K, Marshall M, O'Connor P, Pereira C, Reddy G, Schlichte A, Schoenleber M and Institute for Clinical Systems Improvement. Health Care Guideline: Hypertension Diagnosis and Treatment. Institute for Clinical Systems Improvement, Bloomington. 2012.
47. Hackam DG, Quinn RR, Ravani P, Rabi DM, Dasgupta K, Daskalopoulou SS, Khan NA, Herman RJ, Bacon SL, Cloutier L, Dawes M, Rabkin SW, Gilbert RE, Ruzicka M, McKay DW, Campbell TS, Grover S, Honos G, Schiffrin EL, Bolli P, Wilson TW, Feldman RD, Lindsay P, Hill MD, Gelfer M, Burns KD, Vallee M, Prasad GV, Lebel M, McLean D, Arnold JM, Moe GW, Howlett JG, Boulanger JM, Larochelle P, Leiter LA, Jones C, Ogilvie RI, Woo V, Kaczorowski J, Trudeau L, Petrella RJ, Milot A, Stone JA, Drouin D, Lavoie KL, Lamarre-Cliche M, Godwin M, Tremblay G, Hamet P, Fodor G, Carruthers SG, Pylypchuk GB, Burgess E, Lewanczuk R, Dresser GK, Penner SB, Hegele RA, McFarlane PA, Sharma M, Reid DJ, Tobe SW, Poirier L, Padwal RS. The 2013 Canadian Hypertension Education Program recommendations for blood pressure measurement, diagnosis, assessment of risk, prevention, and treatment of hypertension. *The Canadian Journal of Cardiology*. 2013;29:528-42.
